# Supplementary material for: SERS-based immunoassay using core–shell nanotags and magnetic separation for rapid and sensitive detection of cTnI
Source: Royal Society of Chemistry journal article supplement (doi:10.1039/d0nj05774f), 2021-01-01
Supplement: d0nj05774f1.pdf [file d0nj05774f1.pdf]

## Supporting Information

### **SERS-based immunoassay using core-shell nanotags and magnetic separation for rapid and sensitive detection of cTnI**

Cunming Hu<sup>‡ a</sup>, Li Ma<sup>‡ a</sup>, Fang Mi<sup>a,c</sup>, Ming Guan<sup>\* a</sup>, Chang Guo<sup>b</sup>, Fei Peng<sup>a</sup>, Shijiao Sun<sup>a</sup>, Xiaomei Wang<sup>a</sup>, Tingwei Liu<sup>d</sup>, Jiutong Li<sup>\* d</sup>

<sup>a</sup> College of Chemistry and Chemical Engineering, Xinjiang Normal University, Urumqi 830054, China

<sup>b</sup> College of Pharmacy, Xinjiang Medical University, Urumqi 830011, China

<sup>c</sup> Department of cuisine and Tourism, Bingtuan Xingxin vocational and technical college of Xinjiang Production and Construction Group, Urumqi 830001, China

<sup>d</sup> Shanghai Simp Bio-Science Co., Ltd. Shanghai 200000, China

<sup>‡</sup> These two authors contributed equally to this work.

\* Corresponding author. E-mail: 635880760@qq.com (Ming Guan); E-mail: 2330617483@qq.com (Jiutong Li)

## Experimental

### Screening of cTnI Antibody Pairs

The high sensitivity of SERS immunoassay depends on the specific binding between antigen and antibody. **Therefore**, Colloidal gold immunochromatography was used to screen capture and tracer antibodies. Briefly, captured antibodies were immobilized on the detection line (T-line) of NC film by a desktop dot film gold spraying machine, and 5  $\mu\text{g}$  tracer antibodies were labeled on gold nanoparticles by electrostatic adsorption. 60  $\mu\text{L}$  10 ng/mL cTnI bovine serum sample was mixed with 5  $\mu\text{L}$  gold-labeled antibody and dripped on the sample pad on one side of the test strip. The strength of T-line was observed by naked eyes. As shown in Table S1, except for the capture antibody (Hytest 20C6) and the tracer antibody (Hytest 7B9) pairs of antibodies, the other antibody pairs did not have an immune response, and on the immunochromatographic strip, the detection line did not show or all showed positive. So Hytest 20C6 was chosen as capture antibody and Hytest 7B9 as tracer antibody in subsequent experiments.

### Preparation of streptavidin (SA) magnetic beads

**Preparation of  $\gamma\text{-Fe}_2\text{O}_3$  magnetic nanoparticles.** Ferric urea complexes were prepared as precursors, and  $\gamma\text{-Fe}_2\text{O}_3$  was obtained by thermal decomposition. The specific steps are as follows: Ferric urea complexes were prepared by the reaction of  $\text{Fe}(\text{NO}_3)_3 \cdot 9\text{H}_2\text{O}$  with urea at a molar ratio of 1:6.2. Firstly, under magnetic stirring, appropriate amount of  $\text{Fe}(\text{NO}_3)_3 \cdot 9\text{H}_2\text{O}$  was dissolved in proper amount of absolute ethanol, then urea ( $\text{CON}_2\text{H}_4$ ) was added and stirred for 2.5 h. The obtained light green powder was washed with anhydrous ethanol and dried in an oven to obtain iron urea.  $\gamma\text{-Fe}_2\text{O}_3$  magnetic nanoparticles were prepared by heating iron urea to  $200^\circ\text{C}$  for 1 h.

**Preparation of  $\gamma\text{-Fe}_2\text{O}_3@\text{SiO}_2$ .** Core-shell structured  $\gamma\text{-Fe}_2\text{O}_3@\text{SiO}_2$  magnetic nanomaterials are prepared by reverse microemulsion system. Briefly, cyclohexane, n-hexanol and TritonX-100 were mixed evenly at a ratio of 5:2:1, and appropriate amount of  $\gamma\text{-Fe}_2\text{O}_3$  nanoparticles were added, which were dispersed into the microemulsion system by ultrasound, then the upper liquid was poured out and stirred for 30 min. Then 1 mL of concentrated  $\text{NH}_3$   $\text{H}_2\text{O}$  and 3 mL of ethyl orthosilicate were added and stirred at  $40^\circ\text{C}$  for 3 h. Separate with magnet and wash with absolute ethanol three times, and finally calcine at high temperature ( $400\sim 700^\circ\text{C}$ ) for 3 h, and  $\gamma\text{-Fe}_2\text{O}_3@\text{SiO}_2$  magnetic nanoparticles were successfully synthesized.

**Preparation of SA magnetic beads.** Firstly, surface functionalization of magnetic particles was carried out: appropriate amount of prepared  $\gamma\text{-Fe}_2\text{O}_3@\text{SiO}_2$  was added to a certain amount of mixture of methanol and glycerol, ultrasonic for 30~60 min, then appropriate amount of N-aminoethyl- $\gamma$ -aminopropyl trimethoxysilane was added, and ultrasonic treatment was continued for 10~20 min, so that the solution was mixed evenly, reacted at  $90^\circ\text{C}$  for 2 h, washed with methanol several times, and the particles were collected after vacuum drying. Next, the functionalized

magnetic particles were encapsulated with SA: phosphate buffer (0.1 mol/L) was prepared with deionized water, 5 mg of functionalized magnetic particles were added to 1 mL phosphate solution, dispersed by ultrasound for 5 min, then 100  $\mu$ L SA solution was added, shaking reaction at room temperature for 24 h, then 1 mL glutaraldehyde was added, and cultured for 2 h. Wash 4~5 times with sterilized phosphate buffer, using 1 mL each time, and finally disperse the particles in 1 mL phosphate solution, and store at 4°C.

## Supplementary data

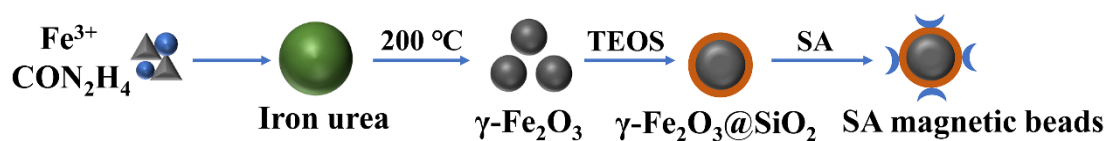

Fig.S1 Preparation process of SA magnetic beads

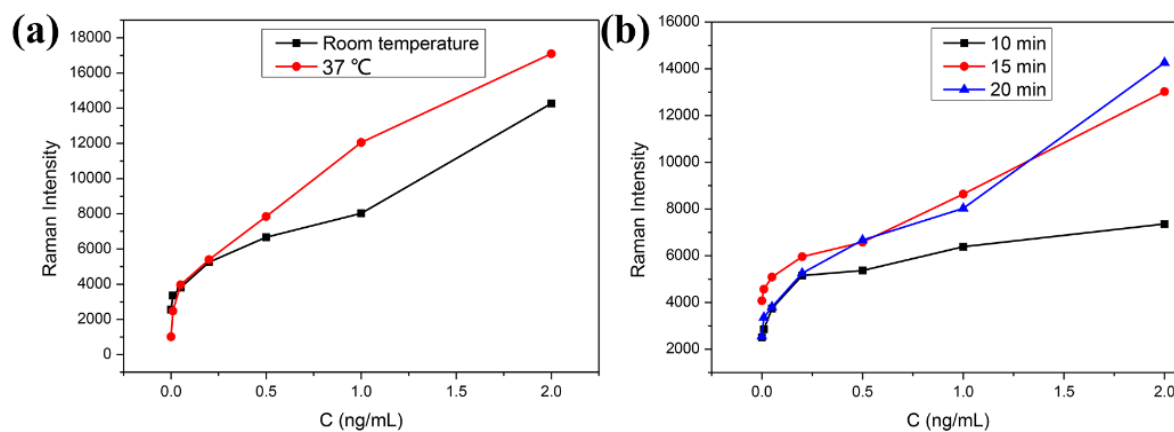

Fig.S2 Raman intensity at different incubation (a) temperature and (b) time

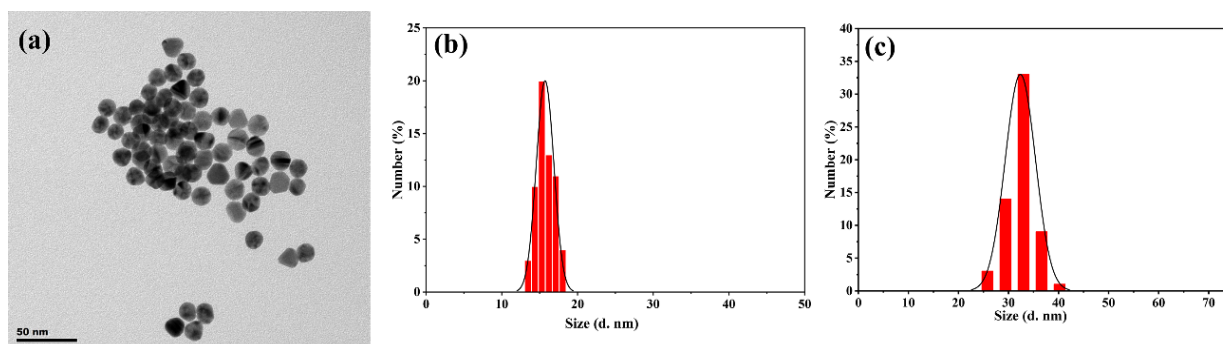

Fig.S3 (a,b) TEM images and particle size distribution of AuNPs. (c) Particle size distribution of Au-4MBA@Ag

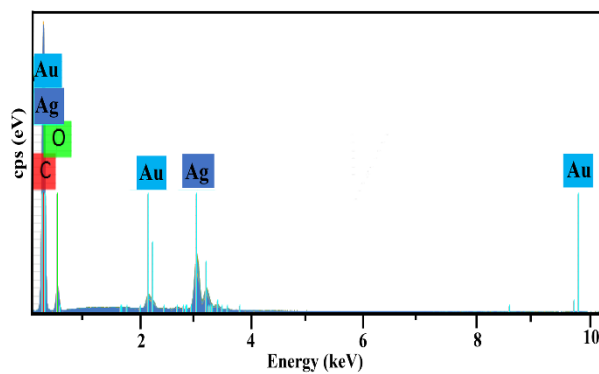

Fig.S4 EDS spectrum of Au-4MBA@Ag.

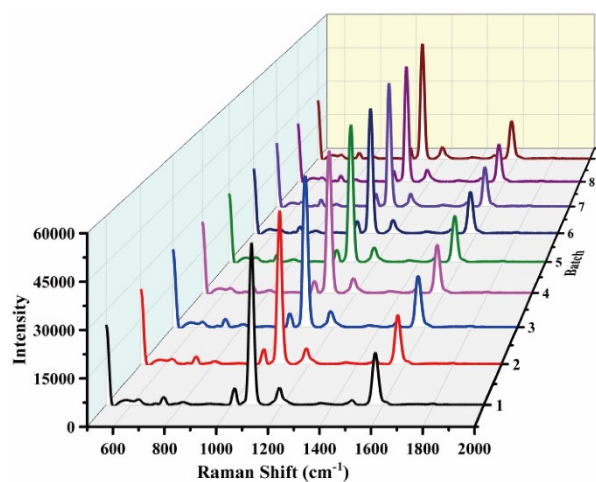

Fig.S5 Reproducibility of Au-4MBA@Ag core shell nanotags.

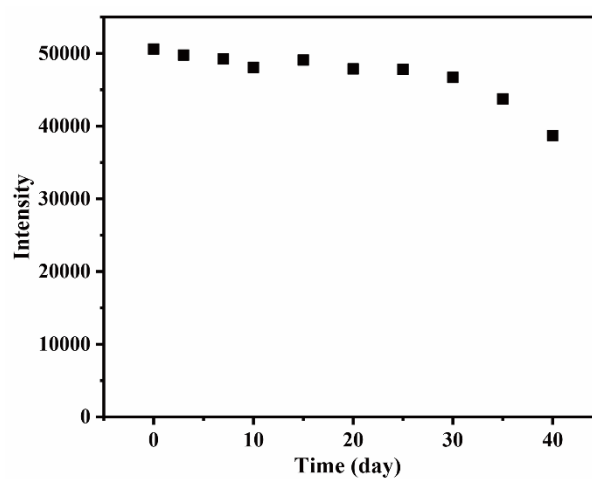

Fig.S6 Stability of Au-4MBA@Ag core shell nanotags.

Table S1 Screening of antibody pairs

| Capture antibody | Tracer antibody | Result |
|------------------|-----------------|--------|
| Medix 7E2        | Hytest 7B9      | No     |
|                  | Medix 2C7       | No     |
|                  | Hytest 19C7     | No     |
| Hytest 20C6      | Hytest 7B9      | Yes    |
|                  | Medix 7E2       | No     |
|                  | Hytest 19C7     | No     |
| Hytest 19C7      | Hytest 7B9      | No     |
|                  | Medix 7E2       | No     |
|                  | Medix 2C7       | No     |
| Medix 2C7        | Hytest 7B9      | No     |
|                  | Medix 7E2       | No     |
|                  | Hytest 19C7     | No     |

Table S2 Spike recovery experiment (n= 3)

|     | Theoretical value<br>(ng/mL) | Raman Intensity | C of detection<br>(ng/mL) | Recovery rate (%) |
|-----|------------------------------|-----------------|---------------------------|-------------------|
| C 1 | 1.09                         | 9177±318        | 1.0066±0.0589             | 92.35             |
| C 2 | 0.91                         | 7947±628        | 0.7910±0.1052             | 87.02             |

Table S3 Interference experiment (n= 3)

| Interference      | C<br>(ng/mL) | Raman Intensity | C of detection<br>(ng/mL) | Recovery<br>rate(%) |
|-------------------|--------------|-----------------|---------------------------|---------------------|
| Bilirubin         | 0.05         | 1946±498        | 0.0537±0.0319             | 102.60              |
|                   | 0.50         | 5259±243        | 0.3877±0.0317             | 85.42               |
|                   | 2.00         | 14084±2525      | 2.0892±0.6388             | 103.11              |
| Hemoglobin        | 0.05         | 1689±178        | 0.0466±0.0115             | 93.20               |
|                   | 0.50         | 5923±595        | 0.5867±0.0647             | 117.34              |
|                   | 2.00         | 13618±1434      | 1.9579±0.3439             | 97.89               |
| Triglyceride      | 0.05         | 1962±408        | 0.0606±0.0100             | 121.60              |
|                   | 0.50         | 5531±505        | 0.6242±0.0668             | 84.92               |
|                   | 2.00         | 12558±981       | 1.7057±0.2234             | 85.28               |
| Heparin sodium    | 0.05         | 1912±277        | 0.0498±0.0180             | 99.60               |
|                   | 0.50         | 5838±460        | 0.4662±0.0648             | 93.24               |
|                   | 2.00         | 12752±2984      | 1.7830±0.7169             | 89.15               |
| EDTA              | 0.05         | 1836±221        | 0.0446±0.0140             | 89.20               |
|                   | 0.50         | 5917±278        | 0.4766±0.0389             | 95.32               |
|                   | 2.00         | 12504±1552      | 1.6995±0.3411             | 84.98               |
| Trisodium citrate | 0.05         | 1841±236        | 0.0489±0.0081             | 97.80               |
|                   | 0.50         | 5732±188        | 0.4508±0.0258             | 90.16               |
|                   | 2.00         | 13142±1984      | 1.8527±0.4623             | 92.46               |
